# Supplementary material for: Functional Characterization of MaZIP4, a Gene Regulating Copper Stress Tolerance in Mulberry (Morus atropurpurea R.)
Source: MDPI journal article supplement (doi:10.3390/life12091311), 2022-08-26
Supplement: s1 [file s1]

## Supplement Materials

Table S1 Screening of differential genes and their corresponding primers

| Gene_id        | Regulated | Name                                    | Primer  | Primer sequence(5'-3') |
|----------------|-----------|-----------------------------------------|---------|------------------------|
| 21390692       | up        | F-box protein PP2-B15                   | Forward | CGATCGCGCATATGGATTGG   |
|                |           |                                         | Reverse | ACCTTGACCTCAAAGCCTCG   |
| 21387802       | up        | Purple acid phosphatase 17              | Forward | ATTGGAGGGGTATTTGCGCCG  |
|                |           |                                         | Reverse | TCCTTCGTGTCACCGTGATG   |
| 21403433       | up        | ATP-dependent DNA helicase MER3 homolog | Forward | TCGAGGTTCTGTTC AAGGC   |
| 21401914       | up        | Cytochrome P450 71A1                    | Reverse | AGGCCATTGCTGACTGAGAC   |
|                |           |                                         | Forward | TGTGGCCGTACATCTCAATCC  |
| 21402441       | up        | Zinc transporter 4                      | Reverse | CTGTTGATGTGCCAGCCTCT   |
|                |           |                                         | Forward | GTGAGGGAGCATTACACCGG   |
| 21387250       | up        | Pathogenesis-related protein 1          | Reverse | TCTTTCTGCCCCTGAGAAACG  |
|                |           |                                         | Forward | CATAGGCCTAGCCATGCTCC   |
| 21397686       | up        | Putative disease resistance protein     | Reverse | TTGTCGTCCACGTCATCTG    |
|                |           |                                         | Forward | AAGCTTCGGTTAGTGCTCCG   |
| 21405925       | up        | Leucoanthocyanidin dioxygenase          | Reverse | TTTGCGCTCTTGCTTCAG     |
|                |           |                                         | Forward | CCATGGTATCCCTGACGAGC   |
| 21399859       | up        | Bark storage protein A                  | Reverse | TTGTTTGCGAGCTTGCTTC    |
|                |           |                                         | Forward | GTCTCCAAGGGAAGCCCAAG   |
| 21395828       | up        | Receptor-like protein 12                | Reverse | ACAGCCGA ACTCTCCATGTC  |
|                |           |                                         | Forward | CCTTTCTCGACCTAGGGCAC   |
| 21396136       | down      | Probable protein phosphatase 2C 75      | Reverse | CGACGAGATTGTTGTGAGCG   |
|                |           |                                         | Forward | AGTACTGCCGGAGAATGCTG   |
| 21405820       | down      | (R)-mandelonitrile lyase-like           | Reverse | CTTGCCGCTTCCA ACTGTTC  |
|                |           |                                         | Forward | TGCTACCGGGATTGGAAGTG   |
| 21394160       | down      | Probable protein phosphatase 2C 6       | Reverse | CGGCAACGAAAGGAGACTCA   |
|                |           |                                         | Forward | GGTCATGACGGAGACAGTCG   |
| 21385141       | down      | Protein CLT3                            | Reverse | TCCCTCGACAAAGAACTGCC   |
|                |           |                                         | Forward | TGAAGTGCTGGAACCCAGTG   |
| 21384129       | down      | Wall-associated receptor kinase 2       | Reverse | CTGTATCAGCGGCTTGGAAC   |
|                |           |                                         | Forward | GAAACGCTTACCTCCCTGCT   |
| $\beta$ -actin |           |                                         | Forward | AGCAACTGGGATGACATGGAGA |
|                |           |                                         | Reverse | CGACCACTGGCGTAAAGGGA   |

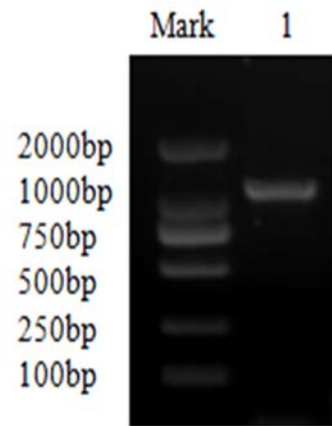

**Figure S1.** MaZIP4 gene amplification of mulberry: PCR in vitro amplification was performed using the designed primers MaZIP4-F and MaZIP4-R, and gene product band of about 1200 bp in length was obtained. M: DL2000 DNA molecular marker 1: Product of RT-PCR.

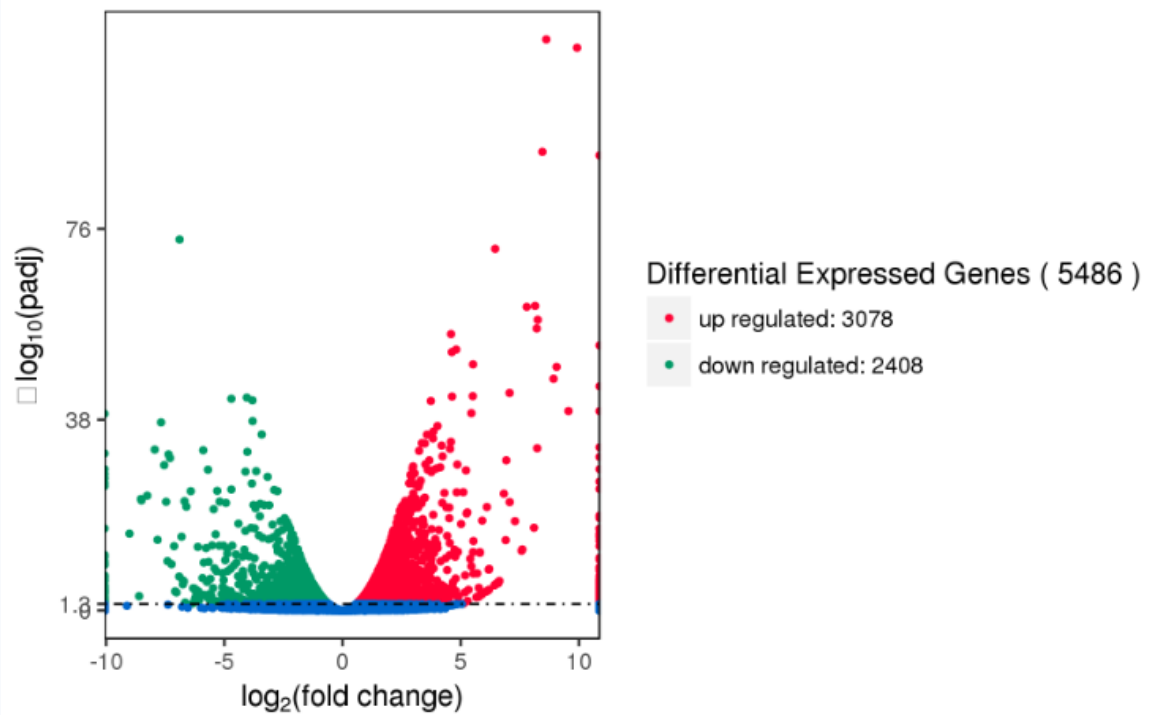

**Figure S2.** Volcano map of differential genes. The overall distribution of DEGs is visualized with a volcano plot, and genes with significant differential expression are indicated by red dots (up-regulated) and green dots (down-regulated), while genes with insignificant differential expression are indicated by blue dots.

1     **ATG**GGCAGCAGCCATCATCATCATCATCACAGCAGCGGCCTGGTGCCGCGCGGCAGCCAT  
 61     M G S S H H H H H S S G L V P R G S H  
 121    ATGGCTAGCATGACTGGTGGACAGCAAATGGGTCGCGGATCCATGGCGAATACAAGTTGC  
 21     M A S M T G G Q Q M G R G S M A N T S C  
 181    CAGAGCGCGGAGCTAGAGGTATGCCGGGATGAATCGGTGGCGCGCGTCCCTCAAATTCGTC  
 41     Q S A E L E V C R D E S V A R V L K F V  
 241    GCCATCGCCTCGATCCTCCTCTCCGGAGTGGCCGGAGTCGCCATTCCCCCTCATTGGAAAAG  
 61     A I A S I L L S G V A G V A I P L I G K  
 301    CACCGCCGGTTTCTCCGCACCGATGGCTGCCTCTTTCGTCGCCGCCAAGGCCTTCGCCGCC  
 81     H R R F L R T D G C L F V A A K A F A A  
 361    GGCGTCATCCTGGCCACCGGGTTCGTCCACATGCTCTCAGGTGGGTTCGGACGCGCTATCC  
 101    G V I L A T G F V H M L S G G S D A L S  
 421    AATCCTTGCCTGCCCCGAGTACCCGTGGGCTAAGTTTCTTTCTGTGGGTTCCTTCGCGATG  
 121    N P C L P E Y P W A K F P F C G F F A M  
 481    ATGGCCTCGCTGTTGACCTTACTCGTTGACTTTATGGGCACTCAGTATTACGAGAAGAAG  
 141    M A S L L T L L V D F M G T Q Y Y E K K  
 541    CAAGGGCTGGCCCCGGTCCAGCAGCGAGGAGCAAGCTCGGGTCGGATCGGAGGATTTCGGGT  
 161    Q G L A R S S S E E Q A R V G S E D S G  
 601    GGTGAAACCGGAATTGTTGCGGTTTCAGGCCAATGATTGGAATGGGAAGGTGTTTCGGAGAA  
 181    G E T G I V A V Q A N D W N G K V F G E  
 661    GAAGAGGGTGGTGGTATGCACATTGTGGGAATGCATGCGCACGCTGCTCACCATAGACAC  
 201    E E G G G M H I V G M H A H A A H H R H  
 721    AGTCATGCTCAAGAGCACGGTGCATGTGATGGGCACGTGAAGGAGCATTACACGGGCAC  
 241    S H A Q E H G A C D G H V K E H S H G H  
 781    GGGCATGACCACGGGCACTCGCATGGGTTGAGAGATGGGGACGAGGAAGGTGGTGTTAGG  
 261    G H D H G H S H G L R D G D E E G G V R  
 841    CACGTCGTCGTTTCTCAGGTTTTGGAACCTTGGGATTGTATCACATTTCAGTTATAATCGGG  
 901    H V V V S Q V L E L G I V S H S V I I G  
 961    CTATCTCTCGGAGTCTCGCAGAGTCCATGTACAATAAGACCCTTAATTGCTGCATTATCC  
 1021    L S L G V S Q S P C T I R P L I A A L S  
 301    TTCCACCAGTTCTTTCGAAGGATTTGCACTCGGAGGCTGCATCGCCCAAGCCCAATTCAAG  
 341    F H Q F F E G F A L G G C I A Q A Q F K  
 361    ACCCTTTTCGGCCACAATAATGGCATGCTTTTTTCGCGATAACTACTCCCGCGGGGATTGGC  
 1141    T L S A T I M A C F F A I T T P A G I G  
 1201    ATTGGGACTGCCATTGCTTCTTTCTACAACCCGTATAGCACTGGAGCATTGGTTACTGAA  
 401    I G T A I A S F Y N P Y S T G A L V T E  
       GGCATTGTTGGATTCTTTGTCTAGCTGGGATTCTAGTCTACATGGCTTTGGTGGACCTGATT  
       G I L D S L S A G I L V Y M A L V D L I  
       GCAGCTGATTTTTTGGAGCAAGAGGATGAGCTGCAATTTTAGGCTGCAAGTGGCATCCTAT  
       A A D F L S K R M S C N F R L Q V A S Y  
       TTAATGCTTTTCTAGGCGCTGGGTTGATGTCTTCATTAGCTATTTGGGCT**TGA**  
       L M L F L G A G L M S S L A I W A \*

**ATG**: the start codon; **TGA**: the stop codon

**Figure S3.** *MaZIP4* gene cDNA sequence and translated amino acid sequence. Sequence analysis of the cloned *MaZIP4* gene using DNAMAN software showed that the sequence length of the *MaZIP4* gene was 1405 bp, containing a complete ORF of 1254 bp, which can encode a protein with 417 amino acids.

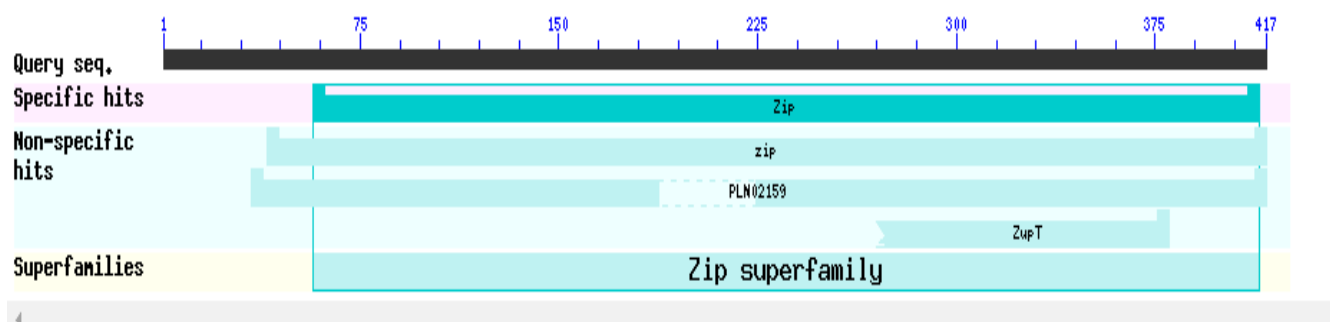

**Figure S4.** Prediction of amino acid sequence encoded by *MaZIP4* gene. NCBI online Blast results indicate that the amino acid family encoded by the *MaZIP4* gene belongs to the *ZIP4* superfamily.

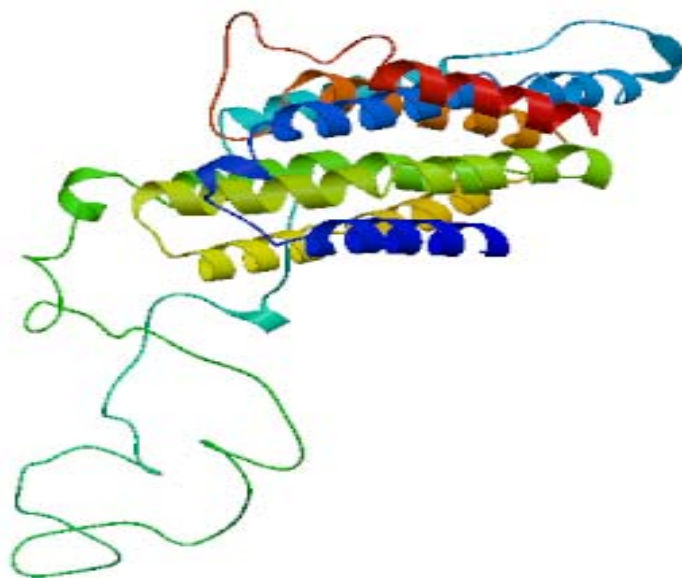

**Figure S5.** *MaZIP4* gene protein tertiary structure. Since the tertiary structure of the *MaZIP4*-encoded protein is similar to that of *ZIP* family proteins, it is speculated that: the *MaZIP4*-encoded protein may have a similar function to that of *ZIP* family proteins.

|                |                                           |
|----------------|-------------------------------------------|
| M.atropurpurea | MGSSHHHHHHSSGLVPRGSHMASMTGGQQMGRGSMANTSC  |
| M.notabilis    | .....MANTSC                               |
| Trema          | MLLLEDIWQFLCLEGFVDKIRLYPGTLLQTVSDSMTNASC  |
| Hevea          | MLFFEDLWELIGLNHFTLKTRALSESLFPGISESMNSSC   |
| Ziziphus       | MLFIEDLWPLLGRLRGFVGKAQGFSDSILQTIISLMTNASC |
| Durio          | MLFIEDIWPLFSIGCFGSKTKLFSESLQSIITDSMNTSC   |
| Cannabis       | MLFLEELWQFLSLGGFVDKTRLSAGFFLQTVSESMANSTC  |
| Corchorus      | .....MTNSSC                               |
| Consensus      | m n c                                     |

|                |                                         |
|----------------|-----------------------------------------|
| M.atropurpurea | HRRELRTDGLFVAAKAFAGVILPTGTFVHMLSGGSDALS |
| M.notabilis    | HRRELRTDGLFVAAKAFAGVILPTGTFVHMLSGGSDALS |
| Trema          | RRRELRTDGLFVAAKAFAGVILPTGTFVHMLSGGSEALS |
| Hevea          | QRRELRTDGLFVAAKAFAGVILPTGTFVHMLSGGSNAIR |
| Ziziphus       | QRRELRTDGLFVAAKAFAGVILPTGTFVHMLSGGSDALS |
| Durio          | QRRELRTDGLFVAAKAFAGVILPTGTFVHMLSGGSDALT |
| Cannabis       | HRRELRTDGLFVAAKAFAGVILPTGTFVHMLSGGSEALS |
| Corchorus      | HRRELRTDGLFVAAKAFAGVILPTGTFVHMLSGGSDALT |
| Consensus      | r lrt dg lfvaakafaagvil tgfvhml g al    |

|                |                                        |
|----------------|----------------------------------------|
| M.atropurpurea | NPCLEYPWAKFPFGFAMASLLTLLVDFMGTQYYERK   |
| M.notabilis    | NPCLEYPWAKFPFGFAMASLLTLLVDFMGTQYYERK   |
| Trema          | NPCLEYPWAKFPFGFAMASLLTLLVDFMGTQYYERK   |
| Hevea          | NPCLEYPWSKFPFGFAMASLLTLLVDFMGTQYYERK   |
| Ziziphus       | NPCLEYPWSKFPFGFAMASLLTLLVDFMGTQYYERK   |
| Durio          | LPCLKYPWSKFPFGFAMASLLTLLVDFMGTQYYERK   |
| Cannabis       | NPCLEKYPWSKFPFGFAMASLLTLLVDFMGTQYYERK  |
| Corchorus      | NPCLEKYPWSKFPFGFAMASLLTLLVDFMGTQYYERK  |
| Consensus      | pclp pw kfpf gf am a l tllvdf gtqyye k |

|                |                                           |
|----------------|-------------------------------------------|
| M.atropurpurea | QG.LARSSSBEQARVGSSEDSGGGTG.IVA.VQANDWNGKV |
| M.notabilis    | QG.LARPSSBEQARVGSDDSGGTG.IVA.LQANDWNGKV   |
| Trema          | QG.LARNSBDQGRVGSSEDSGMESG.IVPVVQAKENGV    |
| Hevea          | QG.LNR.ASBEQARVGSVDVGPDS.IVPFAGEKEPNGKV   |
| Ziziphus       | QG.LAKP.SBERVRVGFDDSGLEST.IVP.AQAKENGV    |
| Durio          | QG.LARGKTBEQGRVESLEADSESA.IVPVVEGKDWNGKV  |
| Cannabis       | QGKKTRFNGBEQSRVGSSED..ESG.IVR.VGSKEWNGKV  |
| Corchorus      | QG.LARGSTBEQARVLSIEADSESA.GIMPVLEAKDRNGKV |
| Consensus      | qg e rv i ngkv                            |

|                |                                         |
|----------------|-----------------------------------------|
| M.atropurpurea | FGEEEGGGMHIVGMHAHAHHRHSHAQEHGACDGHVKE.. |
| M.notabilis    | FGEEEGGGMHIVGMHAHAHHRHSHAQEHGACDGHVRE.. |
| Trema          | FGEEEGGGMHIVGMHAHAHHRHNPQEQGACDGHVRE..  |
| Hevea          | FGEEEGGGMHIVGMHAHAHHRDHPHGQDQDGHVKE...  |
| Ziziphus       | FGEEEGGGMHIVGMHAHAHHRHNPHEQGACDGHVREQS  |
| Durio          | FGEEEGGGMHIVGMHAHAHHRHSHPHGQDQDGLLRSG   |
| Cannabis       | FGEEEGGGMHIVGMHAHAHHRHSHGQEQGACDGHVTE.. |
| Corchorus      | FGEEEGGGMHIVGMHAHAHHRHNPHEGQDQDGLLRSG   |
| Consensus      | fgeee ggmhivgmhahaahr h cdg             |

|                |                                        |
|----------------|----------------------------------------|
| M.atropurpurea | ....HSHGHG....HDHGSHGLRDGDEEGVVRHVVSQ  |
| M.notabilis    | ....HSHGHG....HDHGSHGLGDGNEEGVVRHVVSQ  |
| Trema          | ....NSX.....XGSHGFGDGDEEGVVRHVVSQ      |
| Hevea          | ....DHGHG.....HNHRFSEGDEESCARHVVSQ     |
| Ziziphus       | HGHEHGHGHG....HGHGSHGLGE.DEDSCVVRHVVSQ |
| Durio          | ....HEHDH.....GHEHGFGGDADNCVVRHVVSQ    |
| Cannabis       | ....VGHGHG....HGHGSHGFGDGDEEGVVRHVVSQ  |
| Corchorus      | ....HEHDHGQHGHSHGHGHGFGGSDDDSCVVRHVVSQ |
| Consensus      | h h g rhv vsq                          |

|                |                                          |
|----------------|------------------------------------------|
| M.atropurpurea | .....VLELGIVSHSVIIGLSL                   |
| M.notabilis    | WAERSYDFDKETYMRIENMTSVLVLELGIVSHSVIIGLSL |
| Trema          | .....VLELGIVSHSVIIGLSL                   |
| Hevea          | .....ILELGVSHSVIIGLSL                    |
| Ziziphus       | .....ILELGIVSHSVIIGLSL                   |
| Durio          | .....ILELGIVSHSVIIGLSL                   |
| Cannabis       | .....VLELGIVSHSVIIGLSL                   |
| Corchorus      | .....VLELGIVSHSVIIGLSL                   |
| Consensus      | lelg vshsviiglsl                         |

  

|                |                                          |
|----------------|------------------------------------------|
| M.atropurpurea | GVSQSPCTIRPLIAALSFHQFFEGFALGGCIQAQFKTIS  |
| M.notabilis    | GVSQSPCTIRPLIAALSFHQFFEGFALGGCIQAQFKNIS  |
| Trema          | GVSQSPCTIRPLIAALSFHQFFEGFALGGCISQAQFKTIS |
| Hevea          | GVSQSPCTIRPLIAALSFHQFFEGFALGGCISQAQFKTIS |
| Ziziphus       | GVSQSPCTIRPLIAALSFHQFFEGFALGGCISQAQFKTIS |
| Durio          | GVSQSPCTIRPLIAALSFHQFFEGFALGGCISQAQFKTIS |
| Cannabis       | GVSQSPCTIRPLIAALSFHQFFEGFALGGCISQAQFKTIS |
| Corchorus      | GVSQSPCTIRPLIAALSFHQFFEGFALGGCISQAQFKTIS |
| Consensus      | gvsqspectirpliaalsfhqffegfalggci qaqfk s |

  

|                |                                          |
|----------------|------------------------------------------|
| M.atropurpurea | ATIMACFFAITTEPGIGIGTAIASFYNPMSTGALVTEGIL |
| M.notabilis    | ATIMACFFAITTEPGIGIGTAIASFYNPMSTGALVTEGIL |
| Trema          | ATIMACFFAITTEPGIGIGTAIASFYNPMSTGALVTEGIL |
| Hevea          | ATIMACFFAITTEPGIGIGTGISFYNPMSTGALVTEGIL  |
| Ziziphus       | ATIMACFFAITTEPGIGIGTAVASFYNPMSTGALVTEGIL |
| Durio          | ATIMACFFAITTEPGIGIGTAVASFYNPMSTGALVTEGIL |
| Cannabis       | TTIMACFFAITTEPGIGIGTAIASFYNPMSTGALVTEGIL |
| Corchorus      | ATIMACFFAITTEPGIGIGTAIASFYNPMSTGALVTEGIL |
| Consensus      | imacffa ttp gigig s ynp s al egil        |

  

|                |                                          |
|----------------|------------------------------------------|
| M.atropurpurea | DSLISAGILVYMALVDLIAADFLSKMSCNFRQLQVASYML |
| M.notabilis    | DSLISAGILVYMALVDLIAADFLSKMSCNFRQLQVASYML |
| Trema          | DSLISAGILVYMALVDLIAADFLSKMSCNFRQLQVASYML |
| Hevea          | DSSSAGILVYMALVDLIAADFLSKMSCNFRQLQVASYML  |
| Ziziphus       | DSLISAGILVYMALVDLIAADFLSKMSCNFRQLQVASYML |
| Durio          | DSLISAGILVYMALVDLIAADFLSKMSCNFRQLQVASYML |
| Cannabis       | DSLISAGILVYMALVDLIAADFLSKMSCNFRQLQVASYML |
| Corchorus      | DSLISAGILVYMALVDLIAADFLSKMSCNFRQLQVASYML |
| Consensus      | ds sagilvymalvdliaadflsk mscnfrlq sy ml  |

  

|                |                     |
|----------------|---------------------|
| M.atropurpurea | FLGAGIMSSLAIWA..... |
| M.notabilis    | FLGAGIMSSLAIWA..... |
| Trema          | FLGAGIMSSLAIWA..... |
| Hevea          | FLGAGMMAALAIWV..... |
| Ziziphus       | FLGAGIMSSLAIWA..... |
| Durio          | FLGAGIMASLAIWA..... |
| Cannabis       | FLGAGIMSSLAIWA..... |
| Corchorus      | FLGAGMMAALAVWA..... |
| Consensus      | flgag m la w        |

**Figure S6.** *MaZIP4* encode multiple sequence alignments of amino acids. Sequence alignment of the *mazip4*-encoded protein sequence in *M. atropurpurea* R. was performed using the multiple sequence alignment function in the online site NCBI.
